# Supplementary material for: A Comparable icELISA and Lateral Flow Immunoassay for the Sensitive and Rapid Detection of 4,4′-Dinitrocarbanilide in Chicken
Source: MDPI journal article supplement (doi:10.3390/toxics11070628), 2023-07-20
Supplement: s1 [file s1]

## Figure Captions

Figure S1. Chemical structures of 4,4'-dinitrocarbanilide and 2-hydroxy-4,6-dinitrocarbanilide.

Figure S2. Optimization of  $K_2CO_3$  amounts for LFIA.

Figure S3. Optimization of mAb concentration for LFIA.

Figure S4. Optimization of the amount of AuNPs-mAb for LFIA.

Figure S5. The cross-reactivity for icELISA.

Figure S6. The cross-reactivity for LFIA.

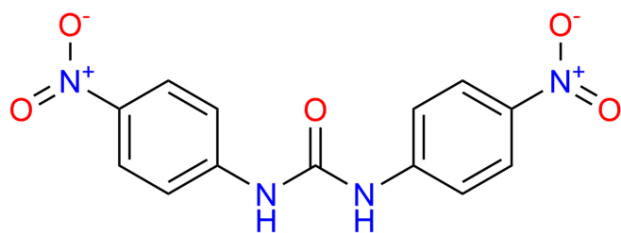

4,4'-dinitrocarbanilide

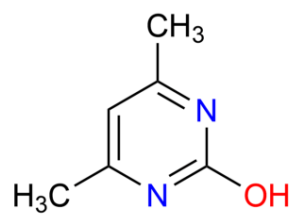

2-hydroxy-4,6-dinitrocarbanilide

Figure S1. Chemical structures of 4,4'-dinitrocarbanilide and 2-hydroxy-4,6-dinitrocarbanilide.

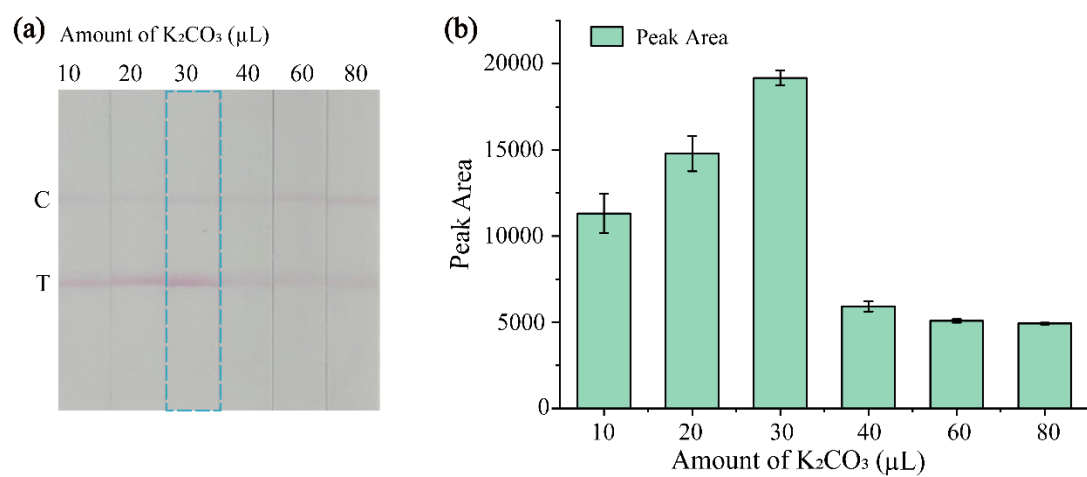

Figure S2. Optimization of  $K_2CO_3$  amounts for LFIA. (a) Photographs of test strips and (b) peak area of T line with the increasing of  $K_2CO_3$  amount. The dashed box on the test strips presented the optimal condition.

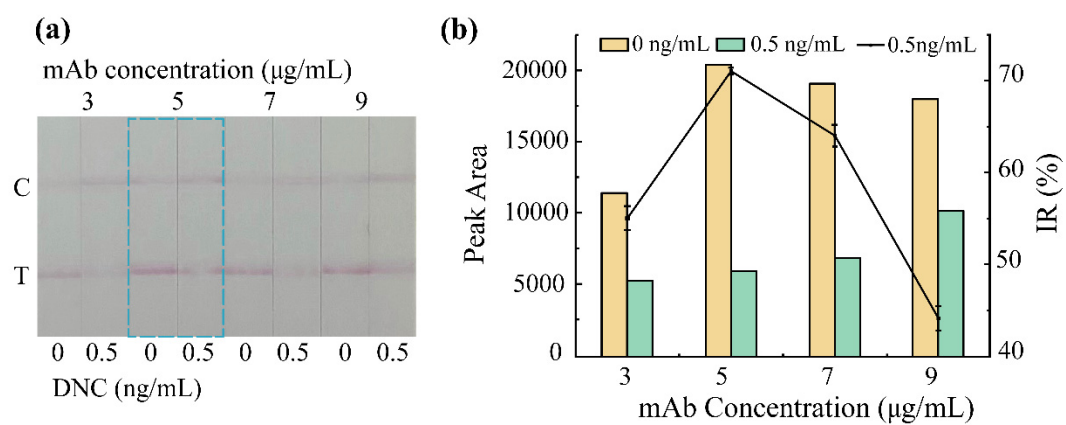

Figure S3. Optimization of mAb concentration for LFIA. (a) Photographs of test strips and (b) peak area of T line in the present (0.5 ng/mL) or absent (0 ng/mL) of DNC with the increasing of mAb concentration.

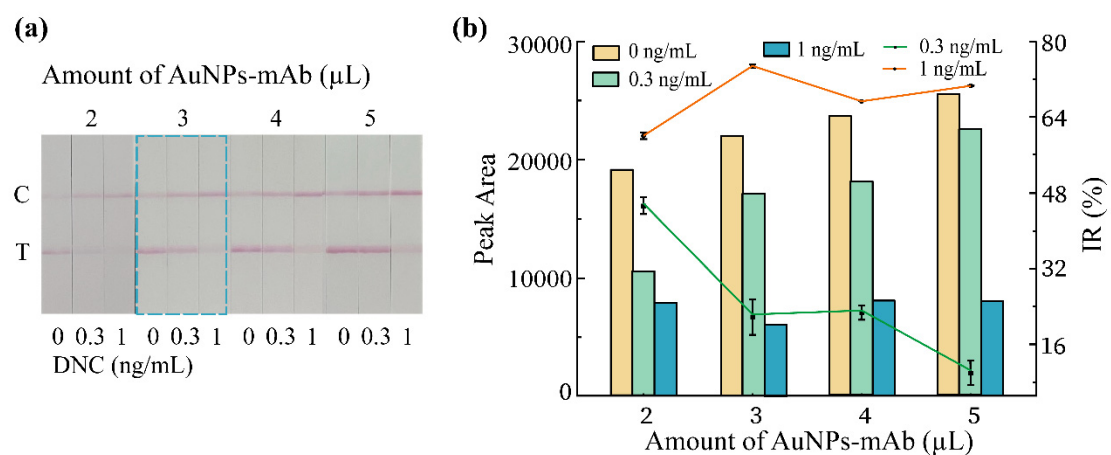

Figure S4. Optimization of the amount of AuNPs-mAb for LFIA. (a) Photographs of test strips and (b) peak area of T line in the present (0.5 and 1 ng/mL) or absent (0 ng/mL) of DNC with the increasing of the amount of AuNPs-mAb.

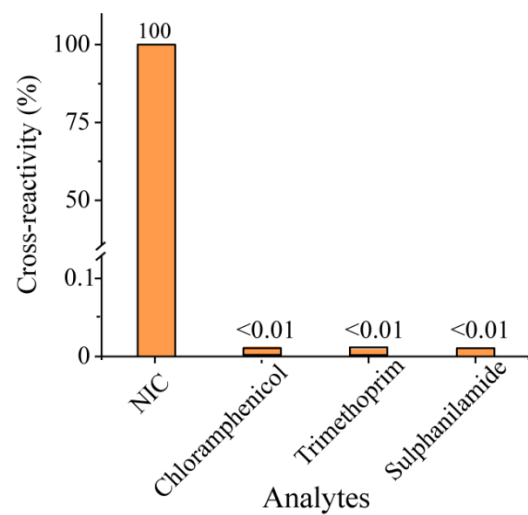

Figure S5. The cross-reactivity for icELISA against DNC, chloramphenicol, trimethoprim, and sulphanilamide. The analytes were spiked in chicken with a concentration of 1000  $\mu\text{g/kg}$ , except for DNC (1.0  $\mu\text{g/kg}$ ).

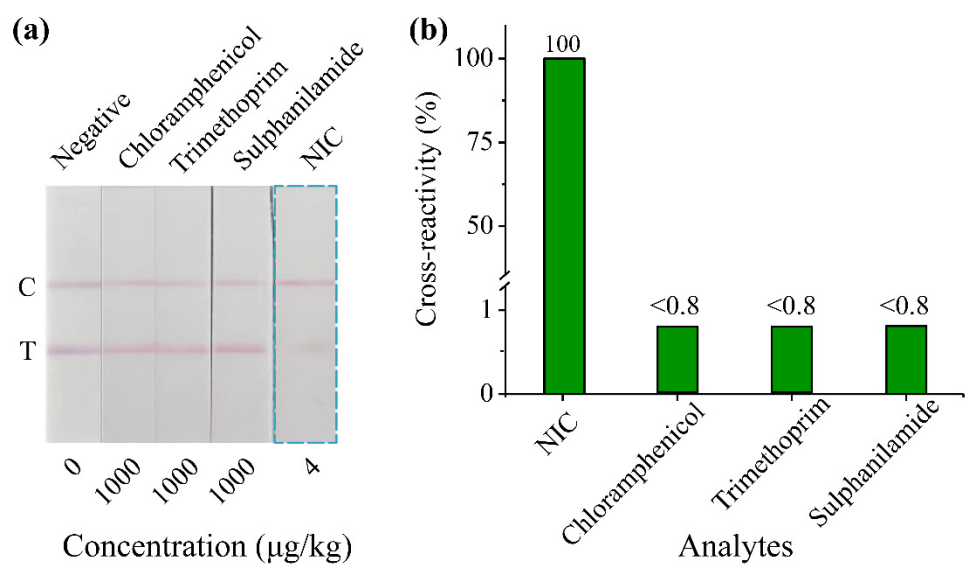

Figure S6. The specificity for LFIA. (a) Photographs of test strips and (b) cross-reactivity against DNC, chloramphenicol, trimethoprim, and sulphanilamide. The analytes were spiked in chicken with a concentration of 1000  $\mu\text{g/kg}$ , except for DNC (8  $\mu\text{g/kg}$ ).
